# Supplementary material for: Physical Activity Levels, Awareness, and Associations with Geriatric Syndromes in Hospitalized Older Adults: A Cross-Sectional Study
Source: Research Square preprint supplement (doi:10.21203/rs.3.rs-7705058/v1), 2025-10-29
Supplement: Supplementary file 1 [file 65f316aae95e0f3adc13b60b.docx]

**Article Title：**“Physical Activity Levels, Awareness, and Associations With Geriatric Syndromes in Hospitalized Older Adults: A Cross-Sectional Study”

**Supplementary Material**

**Content**

[1. Structured Questionnaire:Awareness Regarding Physical Exercise...........................2](#_Toc31069)

[2. Tables S1. 4](#_Toc31069)

[3. Tables S2. 4](#_Toc31069)

[4. Tables S3.](#_Toc31069) 4

[5. Tables S4. 4](#_Toc31069)

[6. Tables S5. 4](#_Toc31069)

[7. Fig. S1. 5](#_Toc31069)

**Structured Questionnaire:**

**Awareness Regarding Physical Exercise**

**Name： Assessment Date: ____ / ____ / ____**

1. **Attitudes: Views on physical exercise during hospitalization (Q1).**

Q1. Which of the following statements do you agree with more?

[1] During hospitalization, I should engage in moderate exercise under safety precautions.

[2] During hospitalization, it doesn’t matter whether one exercises or not.

[3] Due to poor physical health, I should need to rest and recuperate during hospitalization.

**2. Knowledge: Awareness of physical exercise types and recommended volumes (Q2-Q5).**

Q2. Exercise can be categorized into different types, including aerobic exercise (such as walking, cycling, jogging, swimming, etc.), resistance training or strength training (such as resistance band workouts, weightlifting, etc.), balance exercises (like walking in a straight line, standing on one foot), and stretching exercises. For elderly individuals, relying solely on one type of exercise is insufficient; engaging in multiple types of exercises weekly is necessary for better health benefits.

Were you previously aware of these different types of exercises? (e.g.,Did you know what resistance exercise is? Did you know what aerobic exercise is? Did you know what balance training is? Did you know what stretching exercise is?)

[1] No Awareness (Unable to describe any exercise type)

[2] Partially aware (Recognized 1-2 types, e.g., aerobic exercises only)

[3] Basic Understanding (Identified 3 types with limited details)

[4] Full Understanding (Accurately described all categories)

[5] Uncertain

Q3. Current clinical guidelines recommend that elderly individuals (regardless of chronic disease status) should engage in 150-300 minutes of moderate-intensity aerobic exercise or 75-150 minutes of vigorous-intensity aerobic exercise per week.

Were you previously aware of these recommended aerobic exercise guidelines?

[1] Unaware

[2] Aware

[3] Uncertain

Q4. In addition to 150 minutes of aerobic exercise such as walking and cycling weekly, experts also recommend performing strength training (also known as resistance training) for at least 2-3 days per week to increase muscle strength and function.

Were you previously aware of this recommended amount of strength training?

[1] Unaware

[2] Aware

[3] Uncertain

Q5. Besides the above-mentioned aerobic exercise and strength training, experts also recommend performing balance training for at least 3 days per week to enhance body balance and prevent falls.

Were you previously aware of this recommended amount of balance training?

[1] Unaware

[2] Aware

[3] Uncertain

**3. Behavior: Pre-hospitalization exercise habits (Q6-Q8).**

Q6.Prior to hospitalization, did you engage in aerobic exercise (e.g., walking, cycling, swimming, dance-based aerobics, ball sports) for≥30 minutes/day on≥5 days/week or accumulating ≥150 weekly minutes?

[1] Consistently met all weekly targets

[2] Partially met targets

[3] Rarely/Never achieved

[4] Uncertain

Q7. Before your hospitalization, did you perform strength training for at least 3 days per week?

[1] Consistently met all weekly targets

[2] Partially met targets

[3] Rarely/Never achieved

[4] Uncertain

Q8. Before your hospitalization, did you perform balance training for at least 3 days per week?

[1] Consistently met all weekly targets

[2] Partially met targets

[3] Rarely/Never achieved

[4] Uncertain

**4. Confidence: self-efficacy for adhering to exercise recommendations after hospital discharge (Q9)**

Q9. Do you currently believe that you will be able to complete all recommended exercises volumes above after discharge? These include 150 minutes of aerobic exercise, strength training for at least 3 days per week, and balance training for at least 3 days per week.

[1] Unable (Unable to complete any recommended exercises volumes)

[2] Aerobic only (Unable to complete all, but meet only aerobic exercise volumes)

[3] Strength or balance only (Unable to complete all, but can meet strength training or balance training volumes)

[4] Fully adherent (Can achieve all recommended exercise volumes)

[5] Uncertain

| **Table S1. Attitudes: Views on physical exercise during hospitalization** **(Q1)** | |
| --- | --- |
| **Views** | **Agreement, n (%)** |
| I should engage in moderate exercise | 72（52.55%） |
| It doesn’t matter whether one exercises or not | 29（21.17%） |
| I should rest and recuperate | 36（26.28%） |

| **Table S2. Knowledge:Awareness of exercise types (Q2)** | |
| --- | --- |
| **Awareness degree** | **Agreement, n (%)** |
| No Awareness | 36（26.28%） |
| Partially aware | 64（46.72%） |
| Basic Understanding | 32（23.36%） |
| Full Understanding | 1（0.73%） |
| Uncertain | 4（2.92%） |

**Table S3. Knowledge:Awareness of the recommended exercises volumes (Q3, Q4, Q5)**

| **Exercise types** | **Not aware, n（%）** | **Aware, n（%）** | **Uncertain, n（%）** |
| --- | --- | --- | --- |
| Aerobic exercise | 112（81.75%） | 16（11.68%） | 9（6.57%） |
| Strength training | 124（90.51%） | 8（5.84%） | 5（3.65%） |
| Balance training | 124（90.51%） | 7（5.11%） | 6（4.38%） |

**Table S4. Behavior: Self-reported exercise habits before hospitalization to hospital (Q6, Q7, Q8)**

|  | **Consistently met all weekly targets, n (%)** | **Partially met targets, n (%)** | **Rarely/Never achieved, n (%)** | **Uncertain, n (%)** |
| --- | --- | --- | --- | --- |
| Aerobic exercise | 51 (37.23%) | 36 (26.28%) | 46 (33.58%) | 4 (2.92%) |
| strength training | 2 (1.46%) | 10 (7.30%) | 108 (78.83%) | 17 (12.41%) |
| balance training | 1 (0.73%) | 11 (8.03%) | 111 (81.02%) | 14 (10.22%) |

**Table S5. Confidence: self-efficacy for adhering to exercise recommendations after hospital discharge (Q9)**

| **Self-efficacy** | **Agreement, n (%)** |
| --- | --- |
| Fully adherent | 17 (12.41%) |
| Aerobic only | 50 (36.50%) |
| Strength or balance only | 5 (3.65%) |
| Unable | 17 (12.41%) |
| Uncertain | 48 (35.04%) |

**
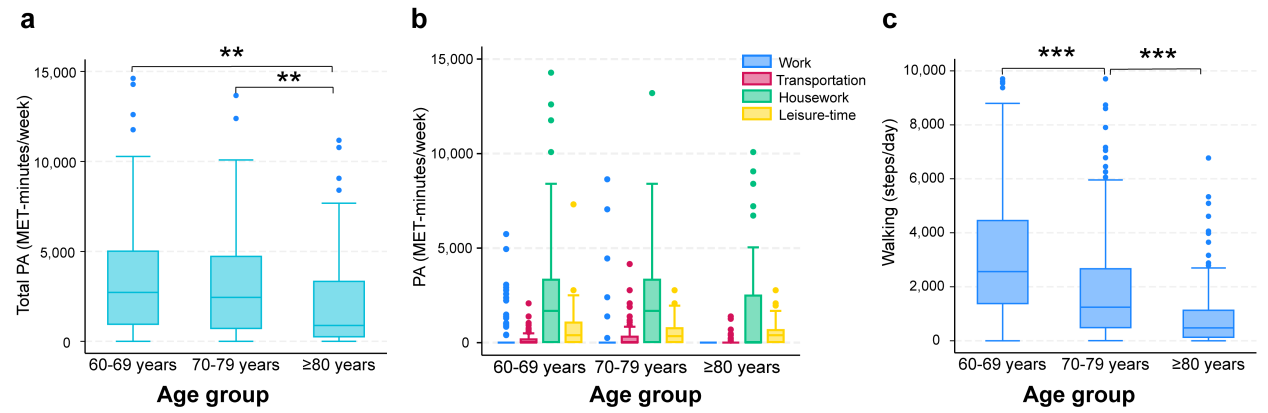
**

**Fig. S1 The physical activity patterns before hospitalization and daily walking steps during hospitalization in older adults.**

*Note:* (a) Pre-hospitalization total PA level by age group; (b) Domain-specific PA by age group; (c) Average daily walking steps during hospitalization by age group. The box represents the IQR (Q1 to Q3), the line is the median; PA = physical activity. ** *p* < .01; *** *p* < .001
